1  
2  
3  
4  
5  
6  
7  
8  
9  
10  
11  
12  
13  
14  
15  
16  
17  
18  
19  
20  
21

## **Sex Solves Haldane's Dilemma.**

Donal A. Hickey

Department of Biology, Concordia University

7141 Sherbrooke West,  
Montreal, Quebec H4B 1R6  
Canada

and

G. Brian Golding

Department of Biology, McMaster University

1280 Main St. West,  
Hamilton, Ontario L8S 4K1  
Canada

22

23 **Abstract**

24 Haldane's dilemma refers to the fact that selection acting at many loci could incur  
25 an unsustainable reproductive cost. This is because natural selection involves the  
26 removal of disfavored genotypes from the population and their replacement with  
27 selectively favored genotypes. Consequently, it requires a certain amount of reproductive  
28 excess to maintain a constant population size. The required reproductive excess is  
29 referred to as the cost of selection. It is generally assumed that this cost is cumulative  
30 when several genetic loci are subject to independent selection. Consequently, even if the  
31 amount of reproductive excess is sufficient to allow allelic replacement at a single locus,  
32 it has been argued that it may not be sufficient to allow many genes to undergo  
33 independent selective replacement simultaneously. This cumulative cost of multi-locus  
34 selection has been seen as a potentially limiting factor on the rate of adaptive evolution.  
35 In this paper we show that Haldane's arguments for the accumulation of costs are valid  
36 for a clonally reproducing population of asexual genotypes. But recombination, in a  
37 randomly mating sexual population, eliminates the accumulation of costs over multiple  
38 loci. Thus, sex removes a perceived reproductive constraint on the rate of adaptive  
39 evolution. These results are particularly relevant to recent evolutionary models of  
40 adaptation based on the standing genetic variation.

41

42

43

## 44 **Introduction**

45 Natural selection depends on reproductive excess because disfavored alleles must  
46 be culled in order for favored alleles to increase in frequency within the selected  
47 population. Such culling, in the absence of a sufficient reproductive excess, would result  
48 in a decrease in population size and, eventually, it could lead to the extinction of the  
49 population. Haldane (1957, 1960) referred to the culling of disfavored types as the “cost  
50 of selection”. In addition to defining this cost, Haldane estimated how great this cost  
51 might be during the substitution of one allele for another at a single locus. He then argued  
52 that, given independent selection at different genetic loci, this cost would be  
53 approximately additive over loci (Haldane 1957, 1960). In other words, if the cost of  
54 allelic substitution at one locus equals  $x$ , then the cost for  $L$  loci would equal  $Lx$ . This  
55 would mean that evolutionary adaptations that involved allelic substitutions at many  
56 genetic loci could prove to be “too costly”, given the available reproductive excess. Thus,  
57 simultaneous selection at many loci might lead to extinction of the population or, at best,  
58 it would constrain the rate of adaptive change. This problem has been referred to as  
59 Haldane’s dilemma (VanValen 1963).

60 Haldane’s calculations of the cost of natural selection had a major impact on the  
61 field of evolutionary biology. For example, Dodson (1962) wondered if the cost were too  
62 high to allow the adaptive divergence between humans and chimpanzees, while Kimura  
63 (1968, 1995) used the concept of selective cost to support his theory of neutral evolution  
64 (see Kern and Hahn 2018 for a recent review). Other studies have pointed out various  
65 possible ways in which the cost of allele substitution at many loci might be reduced. But  
66 all of these solutions involve changing some of the starting assumptions. For example,  
67 Maynard Smith (1968) and Sved (1968) pointed out that the cost could be reduced if we  
68 assume some form of truncation selection rather than independent selection. Grant and  
69 Flake (1974) showed that the cost could be reduced in a sub-divided population. These  
70 solutions are not very intuitively satisfying, however, since they are contingent on  
71 specific forms of selection or population structure. Moreover, while these modifying  
72 assumptions can reduce the accumulation of costs over loci, they do not eliminate it. The  
73 crucial point, however, is that Haldane (1957) did not take recombination into account. In  
74 this paper, we use numerical simulations to demonstrate that Haldane’s argument about

75 the summation of the costs over multiple loci does not apply to a sexually recombining  
76 population – and this is true regardless of the selection scheme or the population  
77 structure. In the Discussion below, we explain why Haldane’s concept of cumulative  
78 costs applies only to a quasi-infinite asexual population. A randomly outbreeding sexual  
79 population, on the other hand, avoids the problem envisaged by Haldane.

80 Haldane’s reasoning (Haldane 1957) for the cost of selection contains two parts.  
81 First, there is the calculation of the reproductive cost of substituting one allele for another  
82 at a single locus. Secondly, there is the summation of these costs over many loci. In  
83 general, the time to fixation is a function of the reproductive capacity and the initial  
84 frequency (see Felsenstein, 1971). The second part of Haldane’s argument is based on the  
85 fact that the expected frequency of genotypes carrying multiple favorable alleles (at  
86 different loci, given linkage equilibrium between loci) is lower than the frequency of  
87 genotypes carrying a single favorable allele. Thus, it would take approximately twice as  
88 long for a genotype carrying two favorable alleles to reach fixation as it would for a  
89 single mutant (Grant and Flake 1974). As we demonstrate in this study, it is this  
90 accumulation of costs over several loci that is avoided through recombination in a  
91 sexually outbreeding population. Specifically, in a sexual population we do not need to  
92 assume an initial population that is large enough to contain at least one individual with  
93 the optimum genotype. And it is precisely this assumption of a very large initial  
94 population that led Haldane to his conclusion that the costs of selection would  
95 accumulate over loci.

96 In fairness to Haldane, it should be noted that his examples of selection at  
97 multiple loci referred explicitly to populations with asexual reproduction. For instance, he  
98 wrote the following: *Consider clonally reproducing bacteria, in which a number of*  
99 *disadvantageous genes are present, kept in being by mutation, each with frequencies of*  
100  *$10^{-4}$ . They become slightly advantageous through a change of environment or residual*  
101 *genotype. Among  $10^{12}$  bacteria, there might be one which possessed three such mutants.*  
102 *But since the cost of selection is proportional to the negative logarithm of the initial*  
103 *frequency the mean cost of selecting its descendants would be the same as that of*  
104 *selection for the three mutants in series, though the process might be quicker (Haldane*  
105 *1957). Therefore, the results presented in the current study should not be seen as a*

106 refutation of Haldane's ideas. Instead, we simply ask if the arguments developed by  
107 Haldane for the accumulation of costs over several loci in a clonally-reproducing  
108 population also apply to non-clonal, i.e., sexual species. Our conclusion is that sexual  
109 outbreeding and recombination allows the population to avoid such an accumulation of  
110 selective costs.

111

## 112 **Materials and Methods**

113 We performed numerical simulations of populations containing 100,000 diploid  
114 individuals. We did ten replicates of each simulation and the results are shown in the  
115 Figures below. We assumed linkage equilibrium in the initial population. We compared  
116 the outcome of multilocus selection in asexual and sexual populations. For the sexual  
117 populations, loci are spaced one centimorgan apart on a linear chromosome. The initial  
118 frequency of the favored allele is 0.01 at each locus. The fitness advantage of a favored  
119 allele is 0.05 and fitness interactions are multiplicative between loci. Individuals  
120 produced an average of two offspring each and selection occurred through differential  
121 viability that was dependent on the genotypic fitness value. We did a series of  
122 simulations in which we varied the number of loci under selection. In each case, we  
123 compared the outcome of selection in asexual and sexual populations. Following  
124 Haldane's example, we assumed that the favorable alleles were already segregating at a  
125 low frequency in the initial population, and that the population was in linkage  
126 equilibrium.

127

## 128 **Results**

129 The results described below illustrate two main points. First, we show why it was  
130 necessary for Haldane (1957) to implicitly assume a larger and larger initial population as  
131 the number of loci under selection increased. The reason was that Haldane's model did  
132 not include recombination between the selected loci; therefore, the initial population had  
133 to be large enough to contain at least one individual that contained all of the favorable  
134 mutations in its genotype. Secondly, we show that there is no need to increase the initial

135 population size for multilocus selection in a sexually outbreeding population. This is  
136 because recombination will automatically produce the genotype with the maximum  
137 number of favored alleles later on during the selection process (see Discussion below).

138 We first performed simulations of the situation where there is only one locus  
139 undergoing selection. This allowed us to check the accuracy of our simulation method  
140 against the theoretical predictions of classical population genetics and it also provided a  
141 reference point for the subsequent simulations involving more than one locus. The results  
142 are presented in Figure 1. The results of ten replicate simulations are shown in Figure 1A,  
143 and the expected rise in allele frequency based on classical population genetics theory (Li  
144 1955 page 258) is shown in Figure 1B. From the Figure, we see that the simulation  
145 results match the theoretical prediction very well and that it takes approximately 200  
146 generations for the favored allele to rise from its initial frequency of 0.01 to fixation.

147 Having established that the simulation provides the expected results for selection  
148 at a single locus, we then performed simulations of selection acting at multiple loci in  
149 both sexual and asexual populations. The results for two loci are shown in Figure 2,  
150 Panels A and B. We see that the asexual and sexual populations yield different results,  
151 even when we are dealing with only two loci. This can be explained as follows. Given  
152 that the initial frequencies of the favored alleles at the two loci are 0.01, then the expected  
153 frequency of chromosomes carrying both favored alleles is one in ten thousand. Thus, we  
154 expect to see twenty such chromosomes among the 100,000 diploid genotypes in the  
155 initial population. But the expected frequency of diploids carrying two such  
156 chromosomes is only one in a hundred million; therefore, we do not expect to see such  
157 double homozygotes in the initial population. This means that the most favored  
158 combination in the initial population is expected to be either a doubly mutant  
159 chromosome in combination with a singly mutant chromosome, or a doubly mutant  
160 chromosome in combination with a non-mutant chromosome, or two singly mutant  
161 chromosomes. This explains why selection on the asexual population results in diploids  
162 carrying only two – or at most three - out the possible four favorable alleles that would  
163 occur in a double homozygote (see Figure 2, Panel A). Of course, if we had assumed a  
164 higher initial frequency for the favored alleles – say 0.1 rather than 0.01 – then the initial  
165 population would have contained some double homozygotes of the favored combination.

166 On the other hand, the problem would have become even more acute if we had used  
167 lower initial allele frequencies. In contrast to the asexual population, however, the sexual  
168 population can generate diploid genotypes carrying four favorable alleles as the allele  
169 frequencies rise at the individual loci (see Figure 2B). In other words, recombination  
170 compensates for the absence of the optimal genotype in the initial population.

171 The results for selection acting simultaneously at four loci are shown in Figure 2,  
172 Panels C and D. In this case, we begin to see an even greater difference between the  
173 asexual and sexual populations. The reason for this difference is that the initial asexual  
174 population lacks many high fitness genotypes. And the reason for this absence is that the  
175 expected frequency of such individuals – given the initial allele frequencies of 0.01 and  
176 linkage equilibrium – is exceedingly small. For example, the expected frequency of  
177 diploid genotypes which are homozygous for the favorable allele at all four loci is only  
178  $10^{-16}$ . Consequently, it would require a population size of many trillions of diploid  
179 individuals in order to see one individual of the optimal genotype within the initial  
180 population. From Figure 2c we can see that the fittest genotypes in the asexual population  
181 contained only two or three out of the eight possible favorable alleles – giving average  
182 frequencies after selection of 0.25 and 0.375, respectively. Of course, the sexual  
183 population is also lacking these high fitness genotypes initially, but this is not a problem  
184 because random recombination can assemble such genotypes as the individual allele  
185 frequencies rise in response to selection. For example, once the allele frequencies have  
186 reached a frequency of 0.5 in an outbreeding sexual population we expect to see some  
187 individuals with the optimal genotype begin to appear within the population of 100,000  
188 diploid individuals.

189 Finally, the results for selection acting on 100 loci are shown in Figure 2, Panels E  
190 and F. In this case, there is a striking difference between the asexual and sexual  
191 populations. The initial population contains only low fitness genotypes where we expect  
192 an average of only one favorable allele per chromosome – given that there are 100 loci  
193 and a frequency of 0.01 for the favorable allele at each locus (see Hickey and Golding  
194 2018). The asexual population is again limited to selecting among such low-fitness  
195 genotypes. In contrast to this, the sexual population can use recombination to gradually  
196 assemble chromosomes with higher and higher numbers of favorable alleles as the

197 frequencies of the favorable alleles rise in response to selection. At the end of the  
198 selection period, the sexual population consists of individuals that are homozygous for  
199 the favored allele at all one hundred loci.

200         These results show that, in a sexually outbreeding population, the frequency of  
201 favorable alleles at many loci can respond simultaneously to independent selection at  
202 rates that are very similar to the predicted rate at a single locus (compare Figure 2f and  
203 Figure 1b). This implies that the rate of response to selection at any given locus is not  
204 greatly impeded by selection at other loci. In other words, many loci can respond  
205 simultaneously to independent selection. In summary, our results show that an asexual  
206 population cannot respond to multilocus selection as efficiently as a sexual population  
207 because it cannot generate higher-fitness genotypic combinations as the allelic  
208 frequencies increase in response to selection. Moreover, the relative disadvantage of the  
209 asexual population increases as the number of loci under selection increases.

210

## 211 **Discussion**

212         In contrast to Haldane's prediction (Haldane 1957, 1960) our simulation results  
213 indicate that allele substitutions at many loci can happen as quickly as substitutions at a  
214 single locus – but only in a sexual population (see Figure 2, Panels B, D and F).  
215 Moreover, this rapid evolution can occur even when the reproductive excess averages  
216 only two offspring per individual (as was the case in our simulations). How can one  
217 explain this seeming contradiction? Clearly, Haldane's scenario does not explain our  
218 simulation results as shown in Figure 2. The reason for the discrepancy is, we believe,  
219 that Haldane's argument assumed that the optimal genotypic combination had to occur in  
220 the initial population and that genotypes can be considered as fixed entities that  
221 reproduce themselves from one generation to another. But these assumptions do not hold  
222 for a sexually outbreeding population. First, the population is usually not large enough to  
223 contain even a single individual with the vanishingly rare optimal genotypic combination;  
224 this fact has already been pointed out by Ewens (1972). Secondly, specific genotypes are  
225 broken down by recombination each generation and replaced by other genotypic  
226 combinations. The process of recombination involves the continual disassembly of



227 existing genotypes and reassembly of new genotypes from one generation to the next.  
228 Because of this process, however, those genotypes which are expected to be vanishingly  
229 rare when the allele frequencies are low will be automatically generated through  
230 recombination once the allele frequencies begin to rise in response to selection (Muller  
231 1932, Hickey and Golding 2018). Consequently, there is no need for the massive culling  
232 that would be required in a very large initial population that contained an extremely rare  
233 optimal genotype. Thus, in an outbreeding sexual population, recombination solves the  
234 perceived problem of costs that are cumulative over different genetic loci. In Haldane's  
235 scenario, it is necessary to "grow" the optimal genotypic combination from an initial,  
236 vanishingly rare frequency to fixation. In practice, however, this optimal combination is  
237 produced by recombination only near the end of the process. This avoids the huge  
238 cumulative cost.

239 Haldane's theory is mathematically very elegant; what happens in nature is  
240 mathematically more muddled, but it is much more efficient. In nature, selection favors a  
241 wide variety of suboptimal combinations which are then recombined. In this way,  
242 recombination can harvest all favorable mutations from any genetic background. It is  
243 often not until quite late in the selection process that the optimal genotypic combination  
244 first appears. For example, even after the allele frequencies at each of 100 loci have risen  
245 to a frequency of 0.9, the probability of randomly generating a chromosome with a  
246 favorable allele at all 100 loci is still less than 0.0001. By the time the individual alleles  
247 have reached a frequency of 0.99, however, more than one third of all chromosomes in  
248 the population are expected to contain the optimal combination - i.e., a favorable allele at  
249 all 100 loci. In other words, rather than increasing slowly from an infinitesimally low  
250 initial frequency as suggested by Haldane (1957), the optimal combination is generated  
251 through recombination near the end of the selection process.

252 The strategy used by nature is somewhat analogous to the process of parallel  
253 computing. Since recombination decouples the allelic changes at a given locus from  
254 changes at other loci, it effectively decomposes multilocus selection into several  
255 simultaneous instances of individual selection. Haldane (1957) envisaged that natural  
256 selection would have to do an exhaustive search through all possible genotypic  
257 combinations; instead, what happens in nature is a massively parallel heuristic search.

258 The process of alternating selection and recombination enables the sexual population to  
259 trace a relatively narrow path through the myriad of possible genotypic combinations  
260 until, eventually, it arrives at the optimum genotypic combination. A comparison between  
261 natural selection and parallel computing has also been made by Wilf and Ewens (2010)  
262 although those authors were referring to the sequential fixation of favorable alleles during  
263 long-term evolution, rather than to the effects of recombination within a population.

264 In a genetically polymorphic sexual population multilocus genotypes are highly  
265 ephemeral. The alternate rounds of genotypic sifting (by selection) and shuffling (by  
266 recombination) result in a gradual increase in the number of favorable alleles per  
267 chromosome. Eventually, chromosomes that contain a favorable allele at every locus  
268 appear. Thus, the genotype is the unit of selection in any given generation, but it is not  
269 the unit of evolution over many generations. Recombination dissolves individual  
270 genotypes each generation and recombines them into new genotypic combinations. In this  
271 way, recombination translates genotypic selection into genic evolution. This effect of  
272 recombination is not so obvious when there are only a few possible genotypic  
273 combinations. But when we consider many loci simultaneously, then each genotype is  
274 effectively unique. This is because existing genotypes are merely a small random sample  
275 of a much larger set of possible genotypes (Ewens 1972, Edhan 2017). Human  
276 populations provide a familiar example: every human individual is genetically distinct,  
277 not only from the billions of other individuals within the current population, but also  
278 from individuals in past and future populations. The genetic uniqueness of human  
279 individuals reflects the fact that the number of possible human genotypes is many orders  
280 of magnitude larger than the total number of humans alive today.

281 If the population is in linkage equilibrium, the expected number of favorable  
282 alleles per chromosome can be inferred from the current allele frequencies at the  
283 individual loci. But if all chromosomes contained exactly the expected number of  
284 favorable alleles, natural selection would be much less efficient. Selection acts on the  
285 distribution of favorable allele numbers around the expected mean. In this way, the coin-  
286 flipping aspect of particulate inheritance in a Mendelian population acts synergistically  
287 with natural selection. And this distribution of allele numbers per chromosome is  
288 regenerated every generation through recombination. This provides another perspective

289 on the synergy between recombination and selection. This point is illustrated in Figure 3.  
290 Since both the asexual and sexual populations were initiated in linkage equilibrium, they  
291 had the same initial range of genotypic fitnesses. Because of this, the response to  
292 selection was similar in both populations in the early generations. As selection proceeded,  
293 however, the genotypic variation in the asexual population was depleted and the average  
294 fitness was limited to the highest fitness in in the initial population (see Figure 3a). In  
295 contrast to this, the sexual population can replenish its genotypic variation every  
296 generation through recombination. This causes the fitness range to be continuously  
297 shifted upwards, thus allowing selection to proceed far beyond the fitness range in the  
298 initial population. What is perhaps surprising is the magnitude of the selective advance in  
299 the sexual population compared to the limited response to selection in the asexual  
300 population, especially when we bear in mind that Figure 3 shows the results for only the  
301 first 60 generations of the simulation. The continued rise in the average frequency of the  
302 favored alleles over 200 generations (shown in Figure 2f) illustrates how the fitness of the  
303 sexual population continues to increase over 200 generations of selection.

304 When considering multi-locus selection, the huge potential fitness difference  
305 between the fittest possible genotype and the least fit genotype is often seen as  
306 unrealistically large. For example, given a selective advantage of only 0.05 per favoured  
307 allele and multiplicative fitness interactions between loci, a diploid genotype that is  
308 homozygous for the favoured allele at one hundred loci would have a fitness value that is  
309 more than 200-fold larger than the fitness of a genotype that is homozygous for the  
310 alternative allele at all 100 loci. The generation of such a huge fitness range in a sexual  
311 population has been seen as a problem (see Crow 1970). But this huge fitness range never  
312 occurs in an actual sexual population of, say, 100,000 individuals. In such a population,  
313 when the allele frequencies are low, the majority of the genotypic fitnesses also cluster  
314 around a relatively low value. And as the allele frequencies rise to higher values in  
315 response to selection, the fitnesses of genotypes also cluster around a correspondingly  
316 higher value. Because of recombination, the sexual population can traverse the very wide  
317 range of possible fitnesses without ever having an unrealistically large variance in fitness  
318 within the population at any given time. As the allele frequencies rise in response to

319 selection, the genotypic fitness distribution moves as a relatively narrow travelling wave  
320 that traverses

321 the entire range of possible fitnesses. The early phase of this process is shown in Figure  
322 3. Although there is a potential two-hundred-fold range in fitness between the  
323 theoretically least fit genotype and the theoretically most fit genotype, the range of  
324 fitnesses in the actual population at any given time is much less than this.

325         Maynard Smith (1971) asked "what use is sex?" Our answer to that question is  
326 that recombination avoids the potentially increasing costs of natural selection as the  
327 number of genes under selection increases. This answer was already hinted at in the  
328 literature, ever since Fisher (1930) stated that the advantage of sexual reproduction is  
329 proportional to the number of genetic loci under selection. Muller (1932, 1964)  
330 developed Fisher's idea and concluded that recombination among many loci could allow  
331 a sexual population to evolve "hundreds to millions of times faster" than a comparable  
332 asexual population. This same idea of an increasing advantage for recombination as the  
333 number of loci under selection increases, has been echoed in later papers (e.g., Crow and  
334 Kimura 1965, Otto and Barton 2001, Iles et al 2003, Park and Krug 2013, Edhan et al  
335 2017). Park and Krug (2013) have shown that the advantage of recombination is  
336 proportional to  $L$ , where  $L$  is the number of loci under selection. Thus, the increasing  
337 advantage of sex as the number of loci under selection increases offsets the increasing  
338 cost of natural selection that was predicted by Haldane (1957).

339         It is interesting to note that Haldane (1957) did not see the relevance of Muller's  
340 ideas about recombination to the problem of reproductive costs that accumulated over  
341 loci. It is perhaps even more interesting that Muller (1964) also did not see the connection  
342 between his own ideas and the problem posed by Haldane (1957). But neither did their  
343 colleagues at the time see the connection (e.g. VanValen 1963). Indeed, we believe that  
344 we are the first authors to have pointed out the direct link between the ideas of Muller  
345 (1932) and those of Haldane (1957). And we have to admit that it was only because of the  
346 counterintuitive nature of our own simulation results that we were forced to re-examine  
347 Haldane's argument in the light of recombination. One could say that the solution to  
348 Haldane's Dilemma has been "hiding in plain sight" for six decades.

349         Our results support models of adaptation based on the standing genetic variation  
350 (see Barrett and Schluter 2007, Orr 2005, Reznick 2016, Schrider and Kern 2017). As  
351 noted by Messer et al (2016) rapid phenotypic evolution suggests that many genomic loci

352 may contribute to strongly selected traits. Molecular studies have confirmed that indeed  
353 several loci are generally involved during rapid evolution (Burke et 2010, Teotonio et al  
354 2009). Moreover, there is direct experimental evidence that recombination facilitates the  
355 rapid response to multilocus selection (McDonald et al 2016, Kosheleva and Desai 2018).  
356 The relevance of our work is that it removes any concerns about the high cumulative  
357 costs of multilocus selection as argued by Haldane (1957), provided of course that there  
358 is recombination occurring between the selected genes.

359 In this study, we assumed – for computational convenience – that there were only  
360 100 biallelic loci. The early, conservative estimates of genetic variation in natural  
361 populations concluded that approximately twenty percent of the loci within the  
362 eukaryotic genome are polymorphic (Lewontin and Hubby, 1966). If we assume that  
363 there are 4,000 polymorphic loci – with two alleles at each locus – there are  $2^{4,000}$   
364 possible genotypic combinations, a number which is greater than  $10^{1,000}$ . This number is  
365 far greater than the total number of atoms in the observable universe – which has been  
366 estimated to be approximately  $10^{80}$  (see Hogan 2000). Darwin stated that “endless forms”  
367 have evolved as a result of natural selection. We could say that this process has been  
368 facilitated through the production of effectively endless genotypic combinations as a  
369 result of sexual reproduction and recombination.

370 In conclusion, sex allows many genes to respond to independent selection at the  
371 same time. In a sexual population, selection on one gene does not slow the rate of  
372 adaptive response at another genetic locus. This is because recombination allows allelic  
373 change at one locus to become independent of the changes at other loci. As stated by  
374 Muller (1932), the allele frequencies at the different loci “diffuse through one another”.  
375 Consequently, even those organisms with limited population sizes and modest  
376 reproductive excess can evolve efficiently. Haldane (1957) predicted that the cost of  
377 selection would pose a particularly difficult challenge for such species. Perhaps this  
378 explains why sex tends to be most common among species with limited population sizes  
379 and modest reproductive excess.

380 Sexual reproduction could be described as “a solution in search of a problem”  
381 whereas Haldane's Dilemma is a problem in search of a solution. In this study, we show  
382 that the former can provide a solution for the latter.

383

384

## 385 **Acknowledgements**

386         This work was supported by a Discovery Grant from NSERC Canada to GBG  
387 (grant no. 140221-10). We are grateful to Richard Lewontin for stimulating discussions  
388 during the early development of this work. We would like to thank Chi Kuen Cheung for  
389 his support and encouragement.

390

391

## 392 **References**

393 Barrett, R.D.H., Schluter, D. 2007. Adaptation from standing genetic variation.

394         Trends Ecol. Evol. 23: 38-44.

395 Burke, M.K., Dunham, J.P., Shahrestani, P., Thornton, K.R., Rose, M.R., Long, A.D.  
396 2010.

397         Genome-wide analysis of a long-term evolution experiment in *Drosophila*.  
398         Nature 467: 587-590.

399 Crow, J.F. 1970. Genetic loads and the cost of natural selection. In: Kojima, K-I.  
400         (Ed.), *Mathematical Topics in Population Genetics*. Springer, 128-177.

401 Crow, J.F., Kimura, M. 1965. Evolution in sexual and asexual populations.  
402         Amer. Natur. 99: 439-450.

403 Dodson, E.O. 1962. Note on the cost of natural selection. Amer. Natur. 96: 123-126.

404 Edhan, O., Hellman, Z., Sherill-Rofe, D., 2017. Sex with no regrets: How sexual  
405         Reproduction uses a no regret learning algorithm for evolutionary advantage.  
406         J Theor Biol. 426, 67-81.

407 Ewens, W. J. 1972. The substitutional load in a finite population. Amer. Natur. 106:  
408         273-282.

409 Felsenstein, J. 1971. On the biological significance of the cost of gene substitution. Amer.  
410         Natur. 105: 1-12.

411 Fisher, R.A., 1930. *The Genetical Theory of Natural Selection*. Oxford: Clarendon.

412 Grant, V., Flake, R.H. 1974. Population structure in relation to the cost of selection.

- 413 Proc. Nat. Acad. Sci USA 71: 1670 -1671.
- 414 Haldane, J.B.S. 1957. The cost of natural selection. *J. Genet.* 55: 511-524.
- 415 Haldane, J.B.S., 1960. More precise expressions for the cost of natural selection.
- 416 *J. Genet.* 57: 351-360.
- 417 Hickey, D.A., Golding, G.B. 2018. The advantage of recombination when selection is
- 418 acting at many loci. *J. Theoret. Biol.* 442: 123-128.
- 419 Hogan, C.J. 2000. Why the universe is just so. *Rev. Mod. Phys.* 72: 1149-1161.
- 420 Iles, M.M., Walters, K., Cannings, C., 2003. Recombination can evolve in large finite
- 421 populations given selection on sufficient loci. *Genetics* 165, 2249-2258.
- 422 Kern, A.D. and Hahn, M.W. 2018. The neutral theory in light of natural selection. *Mol.*
- 423 *Biol. Evol.* 35: 166-1371.
- 424 Kimura, M. 1968. Evolutionary rate at the molecular level. *Nature* 217: 624-626.
- 425 Kimura, M. 1995. Limitations of Darwinian selection in a finite population.
- 426 *Proc. Nat. Acad. Sci. USA* 92: 2343-2344.
- 427 Kosheleva, K., Desai, M.M., 2018. Recombination alters the dynamics of adaptation on
- 428 standing variation in laboratory yeast populations. *Mol. Biol. Evol.* 35: 180-201.
- 429 Lewontin, R.C., Hubby, J.L., 1966. A molecular approach to the study of genic
- 430 Heterozygosity in natural populations. II. Amount of variation and degree of
- 431 heterozygosity in natural populations of *Drosophila pseudoobscura*. *Genetics* 54,
- 432 595-609.
- 433 Li, C.C., 1955. *Population Genetics*, p 258. (University of Chicago Press).
- 434 Maynard Smith, J. 1968. "Haldane's dilemma" and the rate of evolution. *Nature* 219:
- 435 1114-1116.
- 436 Maynard Smith, J. 1971. What use is sex? *J. Theoret. Biol.* 30: 319-335.
- 437 McDonald, M. J., Rice, D. P., Desai, M. M., 2016. Sex speeds adaptation by altering the
- 438 dynamics of molecular evolution. *Nature* 531, 233-236.
- 439 Messer, P.W., Ellner, S.P., Hairston, N.G. 2016. Can population genetics adapt to rapid
- 440 evolution? *Trends Genet.* 32: 408-418.
- 441 Muller, H.J., 1932. Some genetic aspects of sex. *Amer. Natur.* 66: 118-138.
- 442 Muller, H.J., 1964. The relation of recombination to mutational advance.
- 443 *Mutat. Res.* 1: 2 - 9.



- 444 Orr, H.A. 2005. The genetic theory of adaptation: a brief history.  
445 Nat. Rev. Genet. 6: 119-127.
- 446 Otto, S.P., Barton, N., 2001. Selection for recombination in small populations.  
447 Evolution 55, 1921-1931.
- 448 Park, S.-C., Krug, J. 2013. Rate of adaptation in sexuals and asexuals: a solvable model  
449 of  
450 the Fisher-Muller effect. Genetics 195: 941-955.
- 451 Reznick, D. Hard and soft selection revisited: how evolution by natural selection works  
452 in  
453 the real world. J. Hered. 107: 3-14..
- 454 Schrider, D. R. and Kern A.D. 2017. Soft sweeps are the dominant mode of adaptation in  
455 the human genome. Mol. Biol. Evol. 34: 1863-1877.
- 456 Sved, J.A. 1968. Possible rates of gene substitution in evolution. Amer. Natur. 102:  
457 283-293.
- 458 Teotónio, H., Chelo, I.M., Bradic, M., Rose, M.R., Long, A.D., 2009. Experimental  
459 evolution reveals natural selection on standing genetic variation.  
460 Nat Genet. 41, 251-257.
- 461 VanValen, L. 1963. Haldane's dilemma, evolutionary rates, and heterosis.  
462 Amer. Natur. 97: 185-190.
- 463 Wilf, H.S., Ewens, W.J., 2010. There's plenty of time for evolution. Proc. Nat. Acad.  
464 Sci.  
465 USA 107: 22454-22456.  
466

467 **Figure 1.** Selection at a single locus, given an initial frequency of 0.01 and a selective  
468 advantage of 0.05. The population size was 100,000 diploid individuals. Panel A Shows  
469 simulation results for 200 generations (10 replicates, results for individual replicates are  
470 shown). Panel B shows the theoretical, predicted rise in frequency of a favored allele at a  
471 single locus given an initial frequency of 0.01 and a selective advantage of 0.05.

472

473 **Figure 2.** Selection at multiple loci, given an initial frequency of 0.01 for the favorable  
474 alleles and a selective advantage of 0.05. The graph shows the rise in the average  
475 frequency of favorable alleles during the course of selection. The reason that this  
476 frequency does not reach a value of 1.0 in the asexual populations is because the highest  
477 fitness genotype in the initial populations did not contain the maximum number of  
478 favorable alleles (see text). Panels A and B show the results for asexual and sexual  
479 populations, respectively, when selection is acting at two loci. Results for each of ten  
480 replicate simulations are shown separately. Panels C and D show comparable results for  
481 four loci. Panels E and F show the results for 100 loci.

482

483 **Figure 3.** The rise in fitness in response to selection in sexual and asexual populations.  
484 Panel A shows the results for an asexual population of 100,000 asexual individuals; Panel  
485 B shows the results for an outbreeding sexual population of the same size. The solid line  
486 shows the average fitness and the dashed lines show the standard deviation in fitness. The  
487 horizontal dotted line in Panel A indicates the highest fitness in the initial asexual  
488 population. There were 100 loci subject to selection; the initial frequency of favorable  
489 alleles was 0.01 at each locus; the selective advantage of a favorable allele was 0.05.

490

**FIGURE 1**

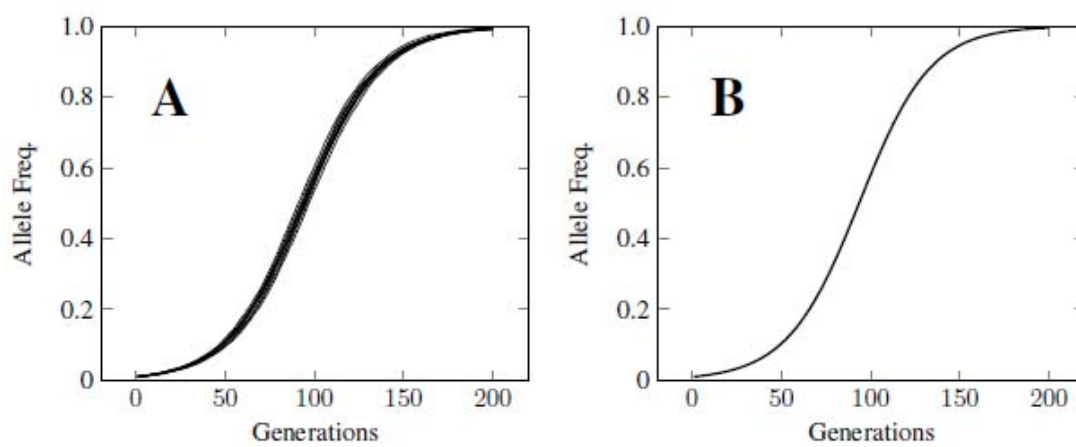

**FIGURE 2**

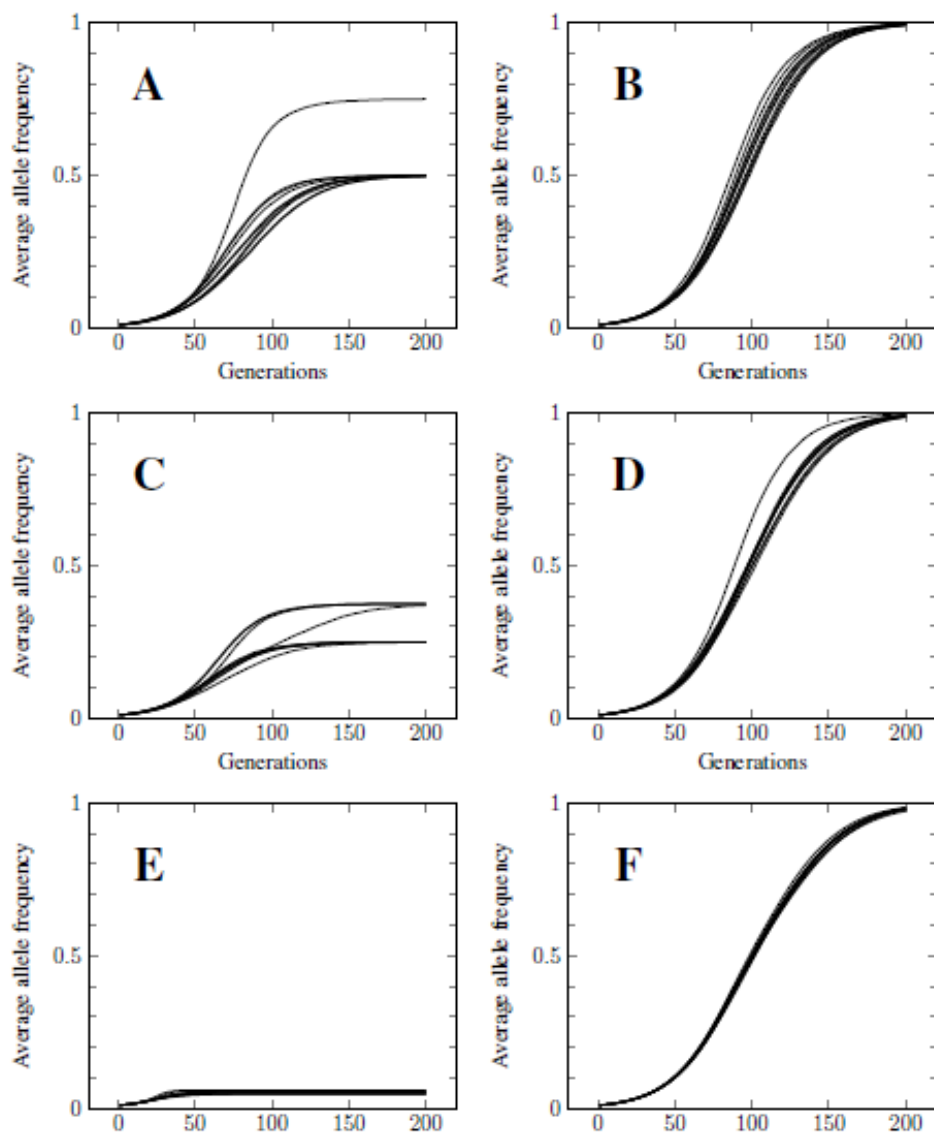

**FIGURE 3**

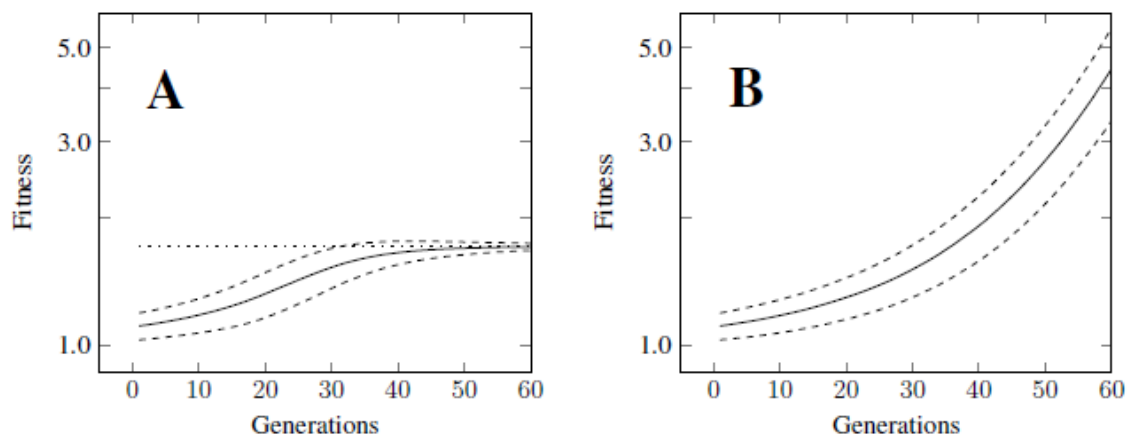

Source: https://www.biorxiv.org/content/10.1101/582536v1.full.pdf
